# Supplementary material for: Chemical and Behavioural Strategies along The Spectrum of Host Specificity in Ant-Associated Silverfish
Source: Research Square preprint supplement (doi:10.21203/rs.3.rs-1108003/v1), 2021-12-16
Supplement: Supplementary file 1 [file 7ed7f2691ffe2239d65744f7.docx]

**Hierarchical clustering of the CHC profiles of ants and associated silverfish**

We conducted a hierarchical cluster analysis (average linkage method) on the matrix with the Bray Curtis similarity distances between the CHC profiles of the ants and silverfish. To avoid overloading of the tree, we grouped the samples of the silverfish found with the same host species and the ant samples per species (by averaging the BC similarites in the matrix). To assess the statistical support of the clusters, we applied multiscale bootstrapping (1000 bootstraps) with the modified pvclust package for the Bray-Curtis similarity matrix. The approximately unbiased P-values are given for each cluster.  Values greater than 95% are considered significant (Suzuki and Shimodeira 2006, Hanson 2021). This tree confirms the clustering of *Messor* specialists with *Messor* ants, the *Aphaenogaster* specialist *Neoasterolepisma delator* with *Aphaenogaster*, the facultatively associate *Lepisma baetica* with *Tetramorium* and three clusters of myrmecophilous silverfish with their *Camponotus* host.


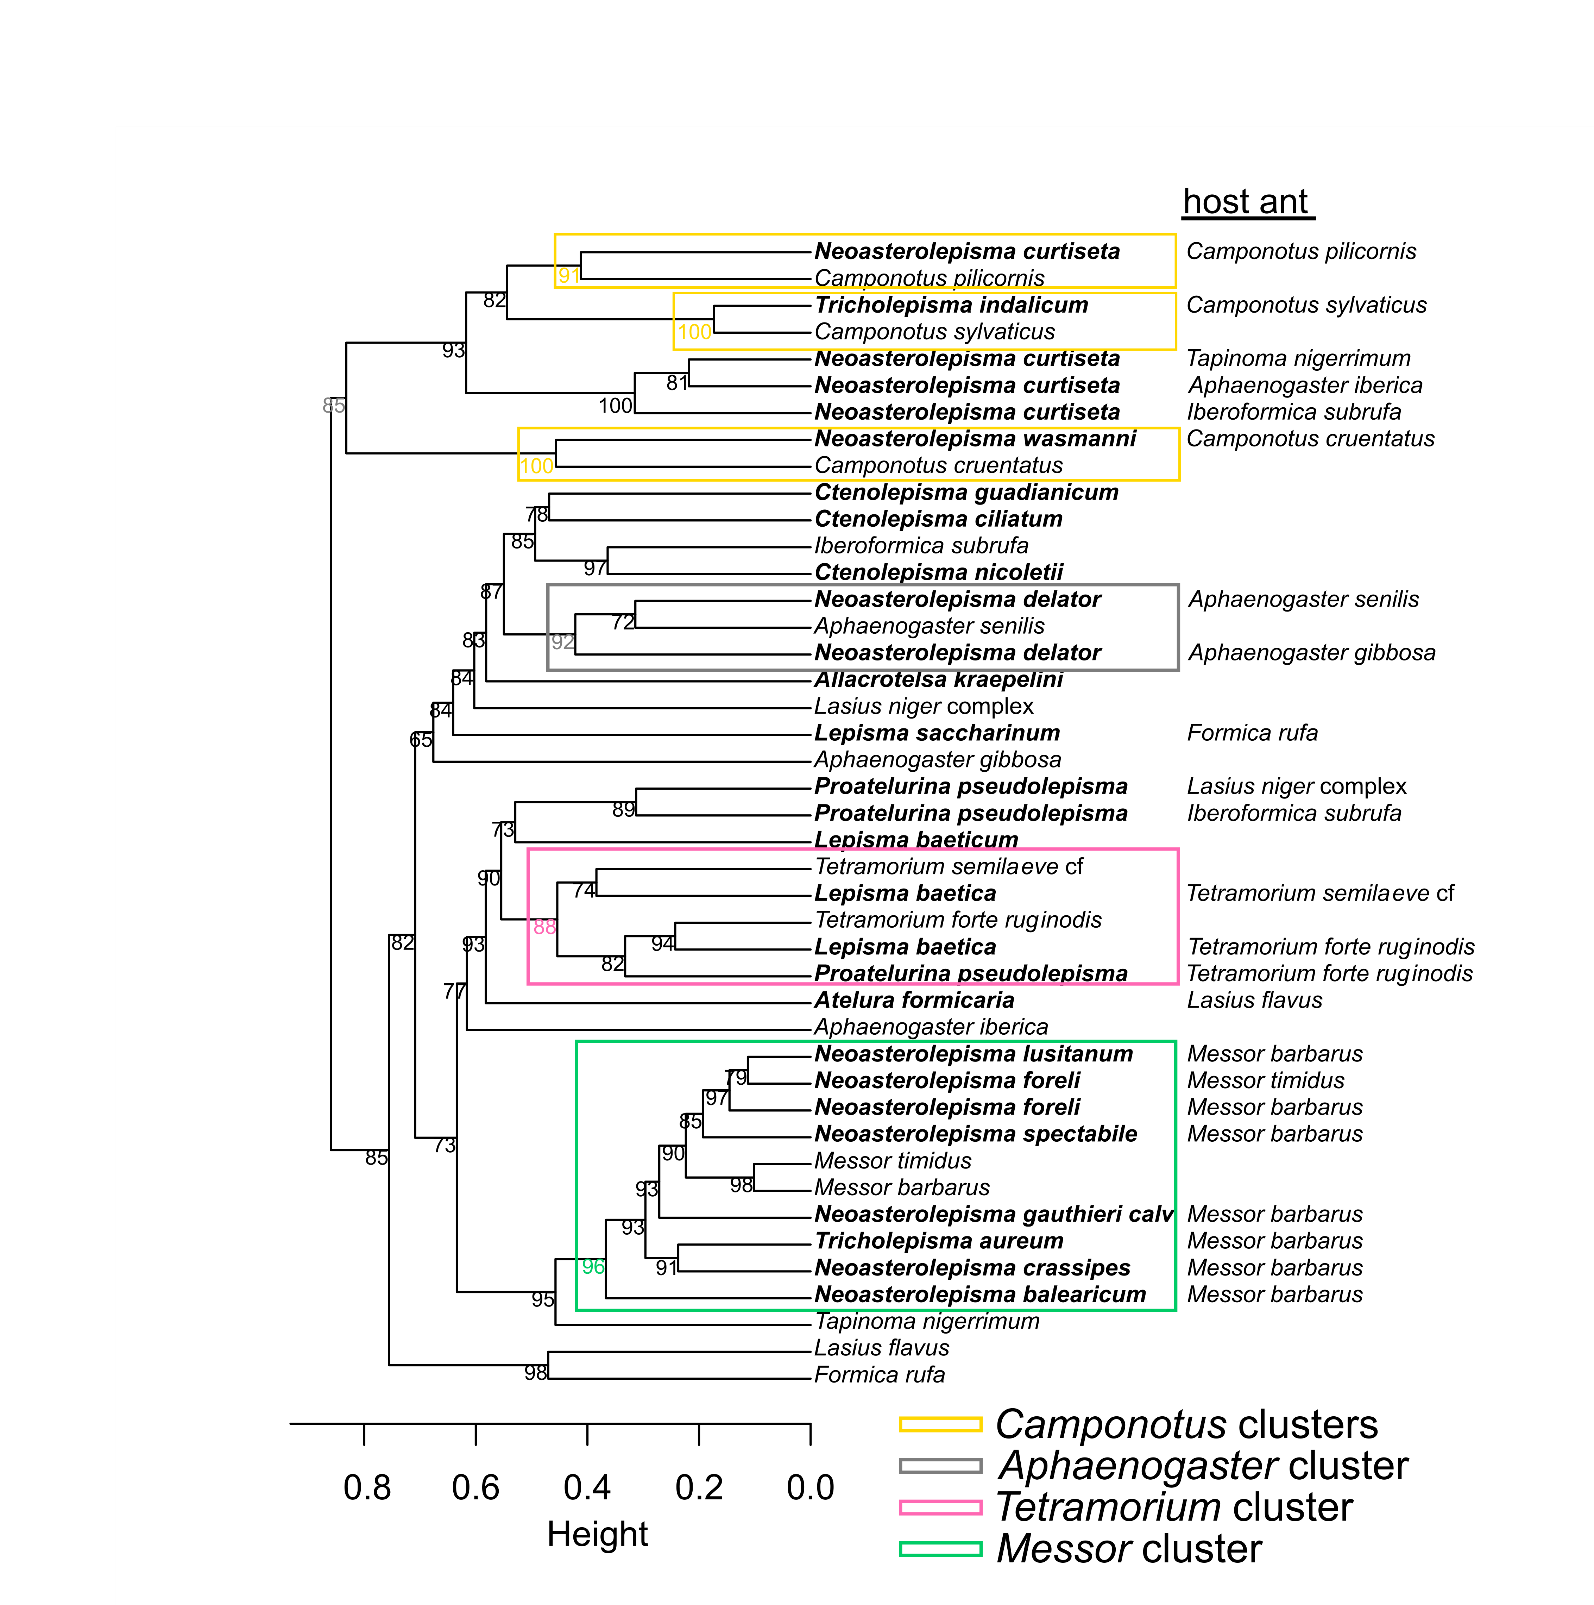


[Suzuki R, Shimodaira H. 2006.](https://www.researchgate.net/publication/7183430_Suzuki_R_Shimodaira_H_Pvclust_an_R_package_for_assessing_the_uncertainty_in_hierarchical_clustering_Bioinformatics_12_1540-1542) "Pvclust: an R package for assessing the uncertainty in hierarchical clustering." Bioinformatics. 22: 1540-1542.

Hanson N. <https://raw.githubusercontent.com/nielshanson/mp_tutorial/master/taxonomic_analysis/code/pvclust_bcdist.R>, Accessed 8th Sept 2021.
